# Supplementary material for: The emergence of bifunctional catalytic properties by the introduction of Bi3+ in defect fluorite-structured PrO1.833
Source: Royal Society of Chemistry journal article supplement (doi:10.1039/d0dt02121k), 2020-01-01
Supplement: d0dt02121k1.pdf [file d0dt02121k1.pdf]

**Electronic supplementary information († ESI)**  
**for**  
**The emergence of bifunctional catalytic property by the introduction of Bi<sup>3+</sup> in defect**  
**fluorite structured PrO<sub>1.833</sub>**

---

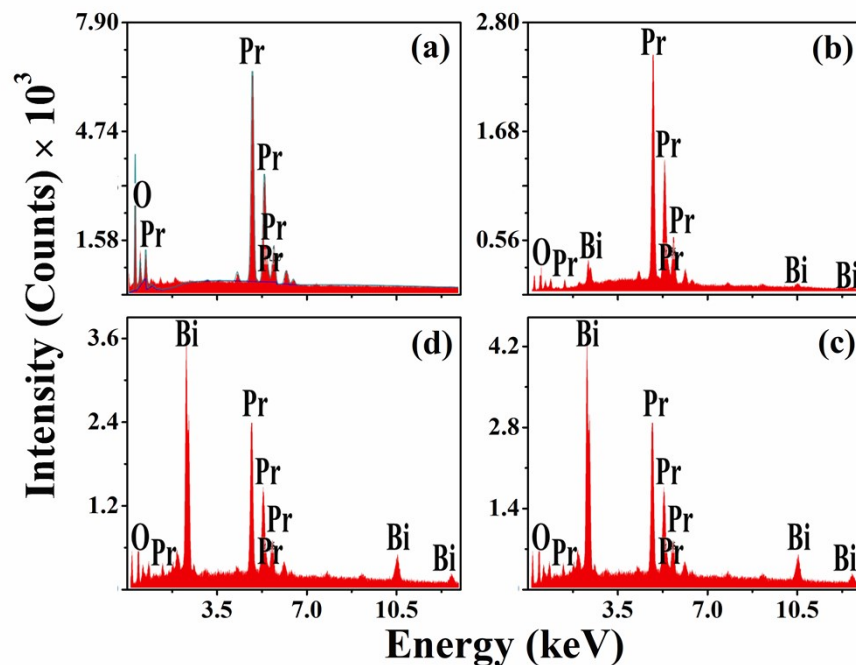

**Fig. S1** shows the energy dispersive spectrum (EDS) along with the elemental analysis of (a) PrO<sub>1.833</sub>, (b) Pr<sub>0.90</sub>Bi<sub>0.10</sub>O<sub>2-δ</sub>, (c) Pr<sub>0.80</sub>Bi<sub>0.20</sub>O<sub>2-δ</sub> and (d) Pr<sub>0.70</sub>Bi<sub>0.30</sub>O<sub>2-δ</sub> samples.

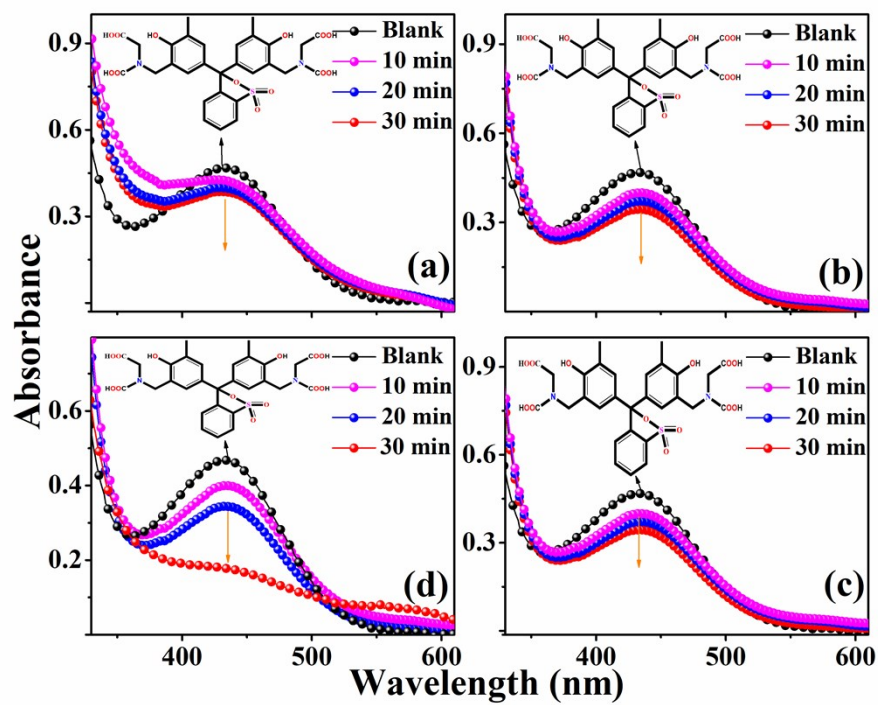

**Fig. S2** shows time-dependent UV-visible spectra of XO ( $1 \times 10^{-4}$  M) dye solution in the presence  $\text{H}_2\text{O}_2$  and 20 mg of (a)  $\text{PrO}_{1.833}$ , (b)  $\text{Pr}_{0.90}\text{Bi}_{0.10}\text{O}_{2-\delta}$ , (c)  $\text{Pr}_{0.80}\text{Bi}_{0.20}\text{O}_{2-\delta}$ , and (d)  $\text{Pr}_{0.70}\text{Bi}_{0.30}\text{O}_{2-\delta}$  sample.

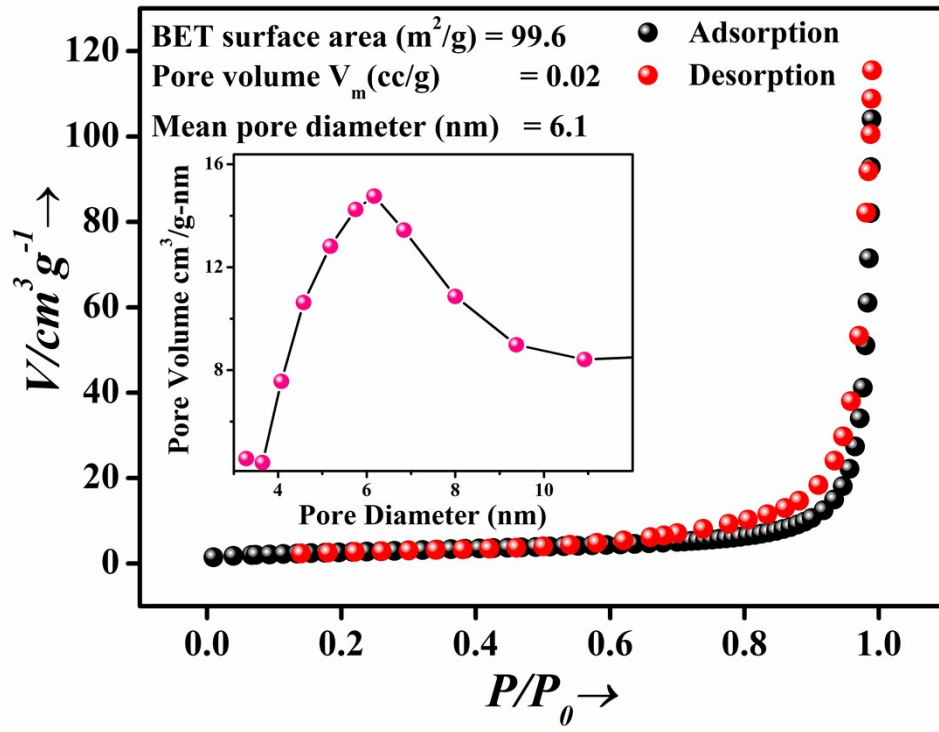

**Fig. S3** shows nitrogen gas adsorption and desorption isotherms on the  $\text{Pr}_{0.60}\text{Bi}_{0.40}\text{O}_{2-\delta}$  sample. The inset shows the plot of pore volume versus pore diameter.

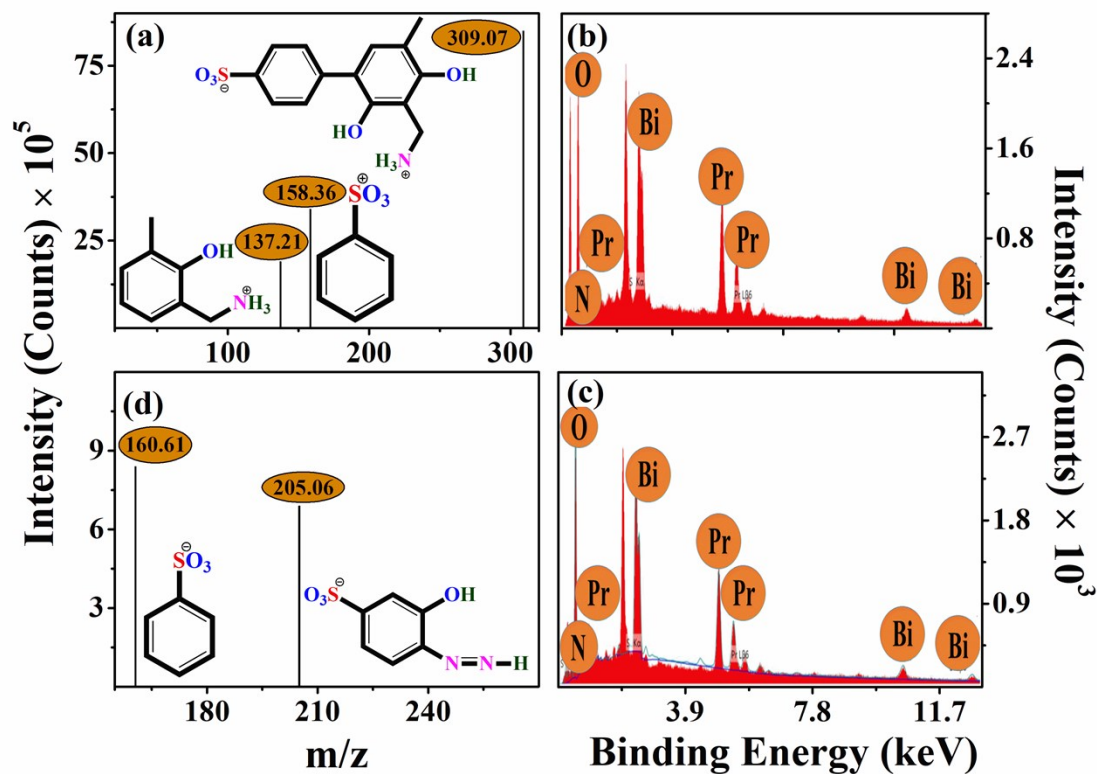

**Fig. S4**(a) and (b) show the mass spectrum of degraded products of XO dye employing  $\text{Pr}_{0.60}\text{Bi}_{0.40}\text{O}_{2-\delta}$  as the catalyst and the EDS spectrum along with the elemental composition of the catalyst after its use. (c) and (d) show the mass spectrum of degraded products of MO dye employing  $\text{Pr}_{0.60}\text{Bi}_{0.40}\text{O}_{2-\delta}$  as the catalyst and the EDS spectrum along with the elemental composition of the catalyst after its use.

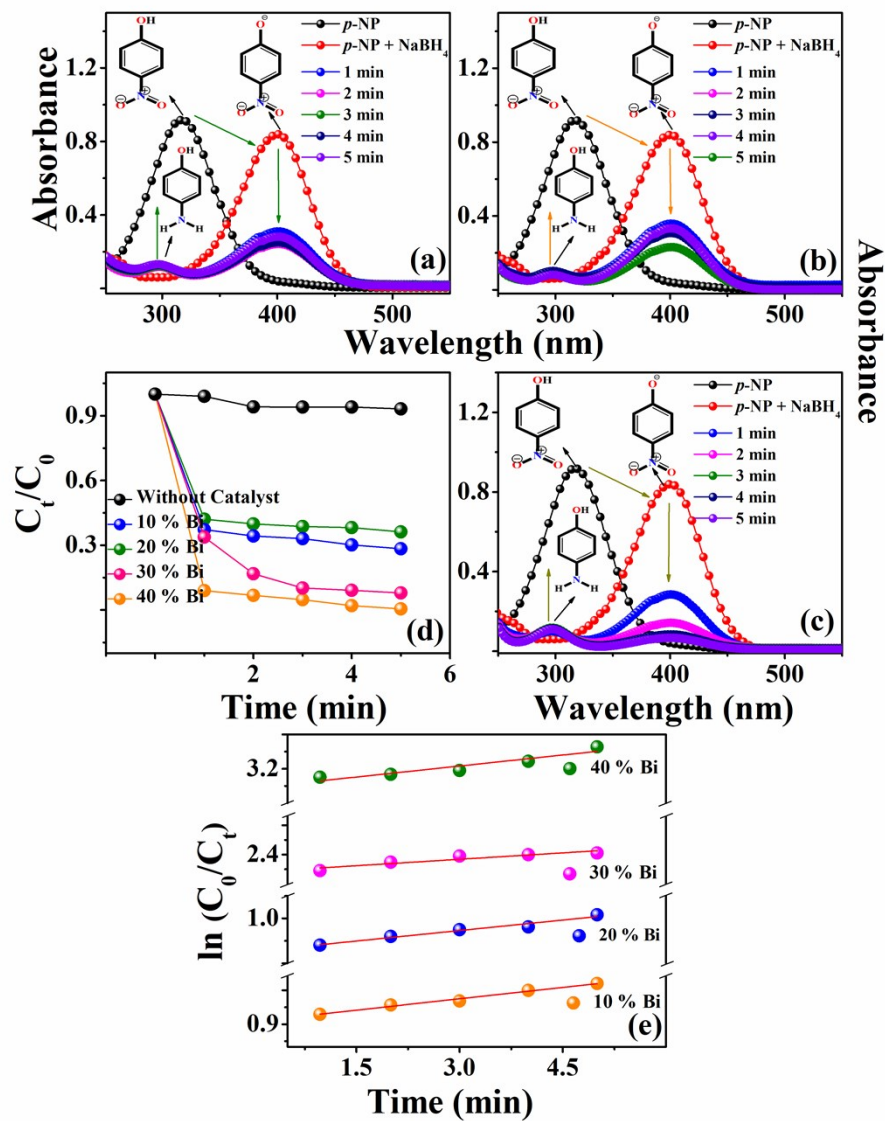

**Fig. S5** shows time-dependent UV-visible spectra of *p*-NP in the presence of 4 mg of  $\text{NaBH}_4$  and 20 mg of (a)  $\text{Pr}_{0.90}\text{Bi}_{0.10}\text{O}_{2-\delta}$ , (b)  $\text{Pr}_{0.80}\text{Bi}_{0.20}\text{O}_{2-\delta}$  and (c)  $\text{Pr}_{0.70}\text{Bi}_{0.30}\text{O}_{2-\delta}$  sample; (d) and (e) show the comparative plots of  $C_t/C_0$  vs. time,  $\ln C_0/C_t$  vs. time of reduction of *p*-NP using the samples  $\text{Pr}_{1-x}\text{Bi}_x\text{O}_{2-\delta}$  ( $x = 0.10 - 0.40$ ).

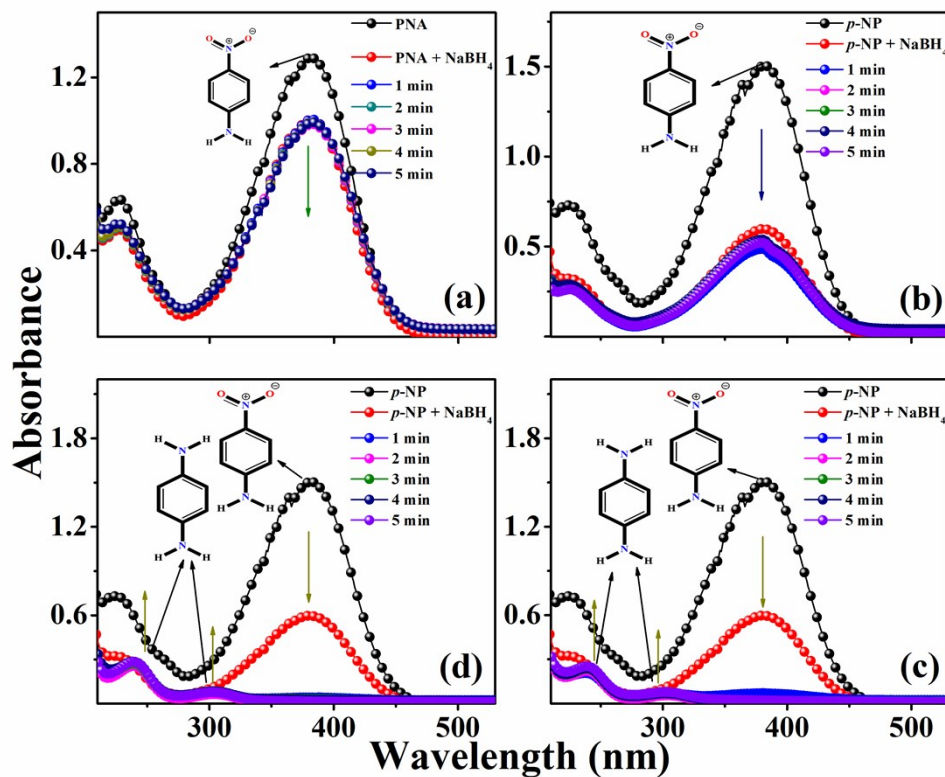

**Fig. S6** shows time-dependent UV-visible spectra of *p*-NA in the presence of 4 mg of NaBH<sub>4</sub> and 20 mg of (a) PrO<sub>1.83</sub>, (b) Pr<sub>0.90</sub>Bi<sub>0.10</sub>O<sub>2-δ</sub>, (c) Pr<sub>0.80</sub>Bi<sub>0.20</sub>O<sub>2-δ</sub> and (d) Pr<sub>0.70</sub>Bi<sub>0.30</sub>O<sub>2-δ</sub> sample.

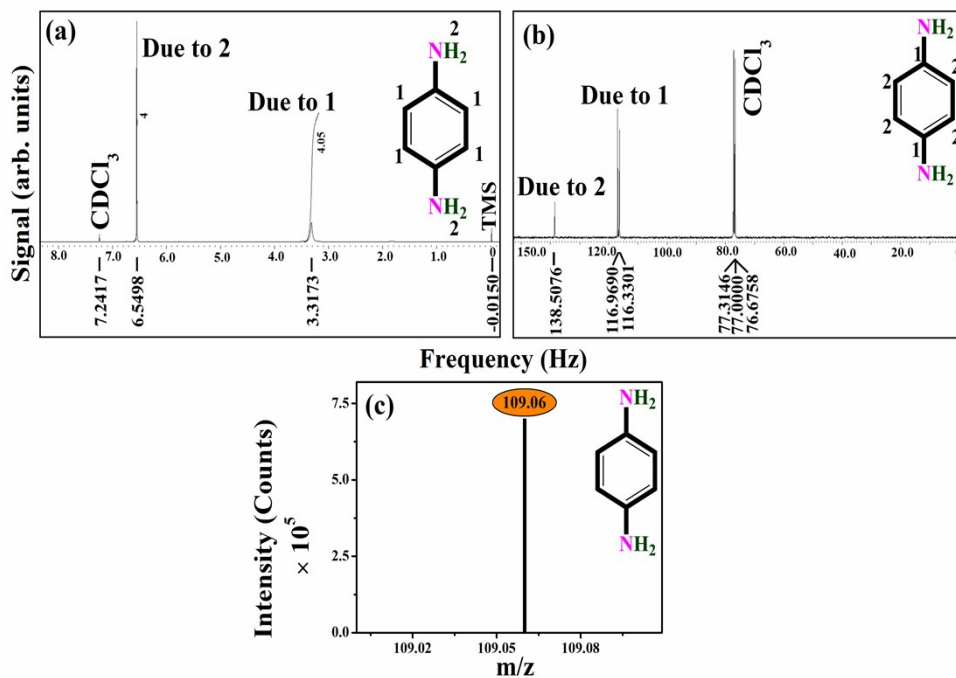

**Fig. S7** shows (a)  $^1\text{H}$  NMR, (b)  $^{13}\text{C}$  NMR spectra, and (c) Mass spectral analysis of the recovered product from the reduction of *p*-NA.

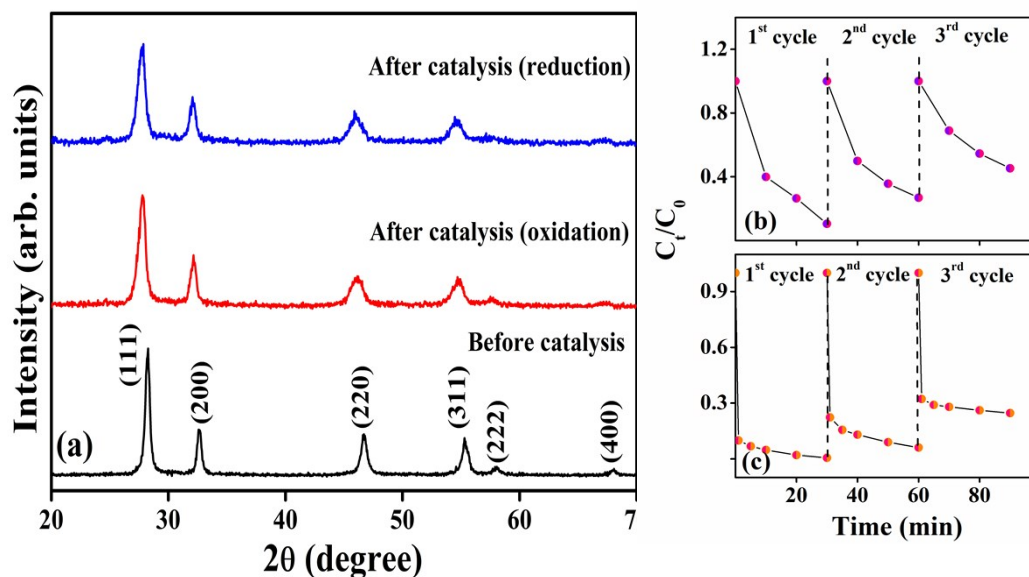

**Fig. S8** (a) shows the PXRD pattern of the catalyst before and after its use for reduction and oxidation of *p*-NP and MO solutions, respectively. (b) and (c) show results from recyclability experiments employing  $\text{Pr}_{0.60}\text{Bi}_{0.40}\text{O}_{2-\delta}$  as the catalyst for the oxidative degradation of MO ( $1 \times 10^{-4}$  M) and reduction of *p*-NP ( $1 \times 10^{-4}$  M) solutions, respectively.
